# Supplementary material for: Gas-phase synthesis of Mg–Ti nanoparticles for solid-state hydrogen storage
Source: Royal Society of Chemistry journal article supplement (doi:10.1039/c5cp03092g), 2015-11-05
Supplement: c5cp03092g1.pdf [file c5cp03092g1.pdf]

## Gas-phase synthesis of Mg-Ti nanoparticles for solid-state hydrogen storage

### Supplementary informations

Table S1: Results of Rietveld analysis of the samples after cycling between 15 and 31 times in the HPDSC: phase abundance, crystallite sizes and lattice parameters of Mg and  $\beta$ -MgH<sub>2</sub>.

| Sample  | Phase abundance (wt.%)    |        |                  |       | Cryst. size (nm)          |         |                  | $\beta$ -MgH <sub>2</sub> cell parameters |              | Mg cell parameters |              |
|---------|---------------------------|--------|------------------|-------|---------------------------|---------|------------------|-------------------------------------------|--------------|--------------------|--------------|
|         | $\beta$ -MgH <sub>2</sub> | Mg     | TiH <sub>2</sub> | MgO   | $\beta$ -MgH <sub>2</sub> | Mg      | TiH <sub>2</sub> | <i>a</i> (Å)                              | <i>c</i> (Å) | <i>a</i> (Å)       | <i>c</i> (Å) |
| MgTi6   | 10(2)                     | 49(5)  | 16(3)            | 25(4) | 61(3)                     | 53(5)   | 7(1)             | 4.5169(16)                                | 3.024(2)     | 3.2109(8)          | 5.2132(14)   |
| MgTi10  | 20(3)                     | 6(1)   | 19(2)            | 55(4) | 38(2)                     | 39(6)   | 1.6(2)           | 4.5202(9)                                 | 3.0226(8)    | 3.2019(16)         | 5.203(5)     |
| MgTi12  | 20(2)                     | 6(1)   | 15(2)            | 59(2) | 50(1)                     | 100(30) | 8(1)             | 4.5186(9)                                 | 3.0219(10)   | 3.2109(12)         | 5.218(4)     |
| MgTi15  | 13.4(6)                   | 18(1)  | 22(2)            | 47(2) | 46(4)                     | 110(30) | 4.1(2)           | 4.5191(11)                                | 3.0212(12)   | 3.2064(10)         | 5.203(2)     |
| MgTi9H  | 10.6(7)                   | 1.7(2) | 5.3(4)           | 82(3) | 91(5)                     | 53(14)  | 4.4(4)           | 4.5183(4)                                 | 3.0225(5)    | 3.2125(17)         | 5.223(6)     |
| MgTi12H | 7.3(5)                    | 0      | 8.7(5)           | 84(4) | 38(1)                     | -       | 4.7(1)           | 4.5190(12)                                | 3.0232(13)   | -                  | -            |
| MgTi22H | 8.6(6)                    | 0      | 17(1)            | 75(4) | 42(4)                     | -       | 6.1(7)           | 4.523(2)                                  | 3.027(2)     | -                  | -            |

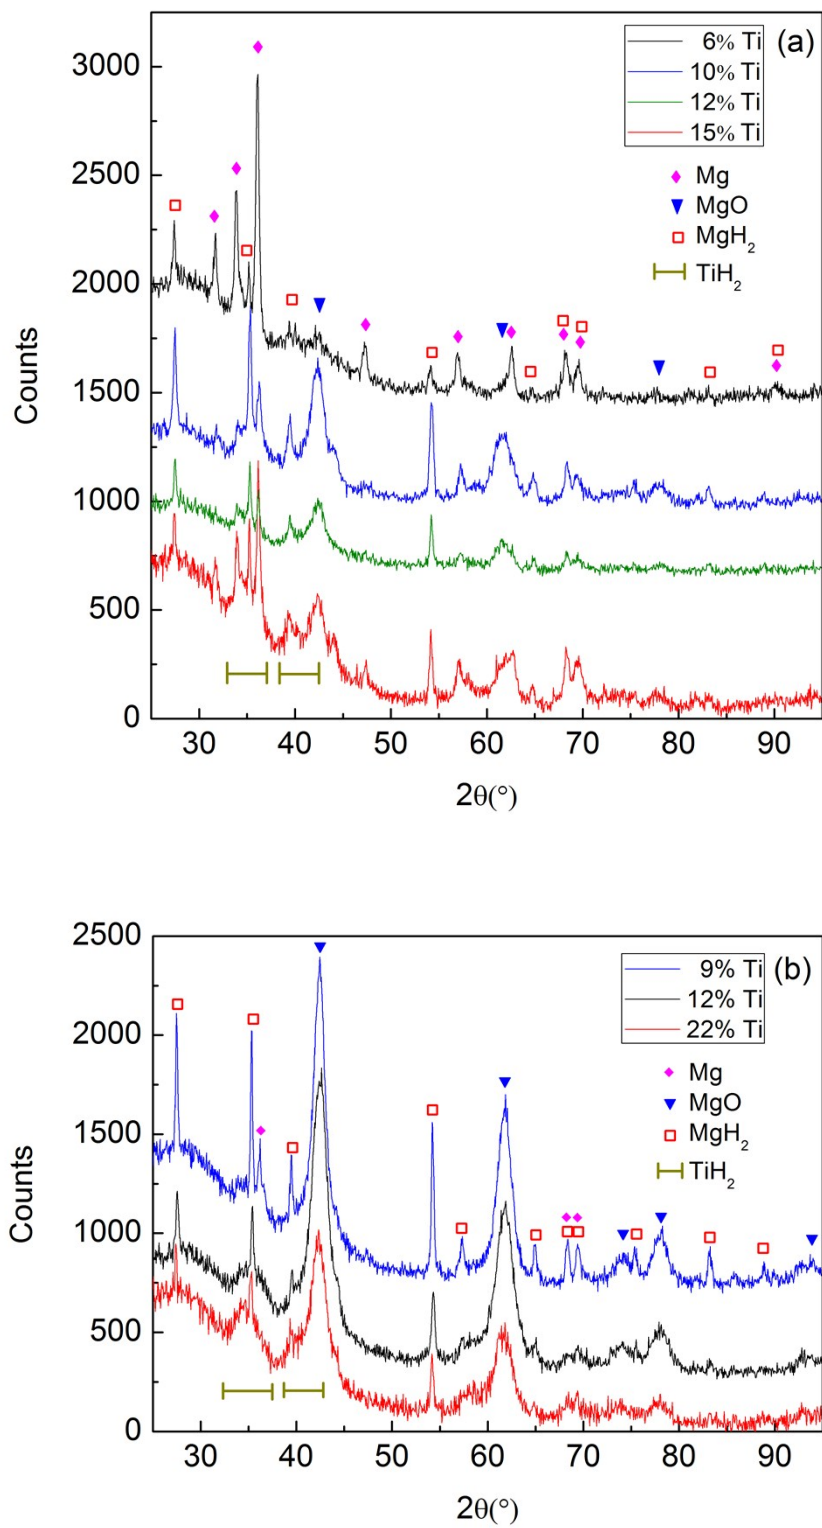

Figure S1: XRD profiles of MgTi# (a) and MgTi#H (b) samples after HPDSC cycles, ended with an absorption.

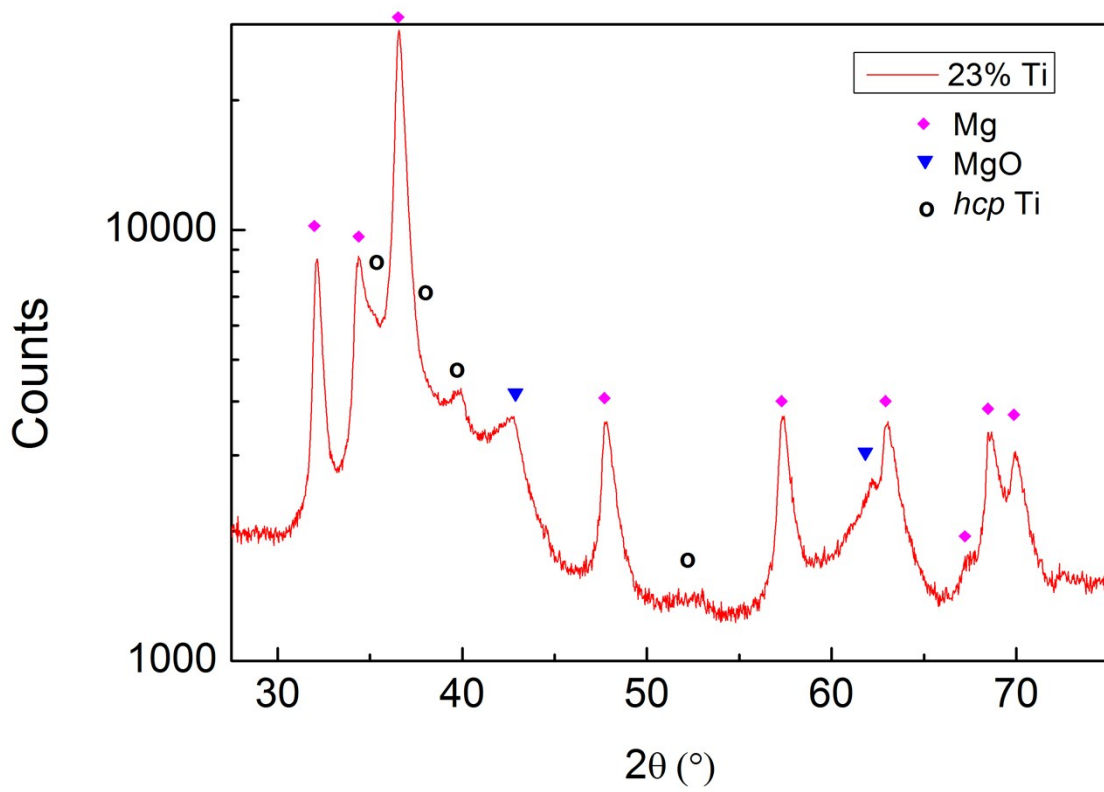

Figure S2: XRD profile of an as prepared sample without *in situ* hydrogenation with 23 at.% Ti.

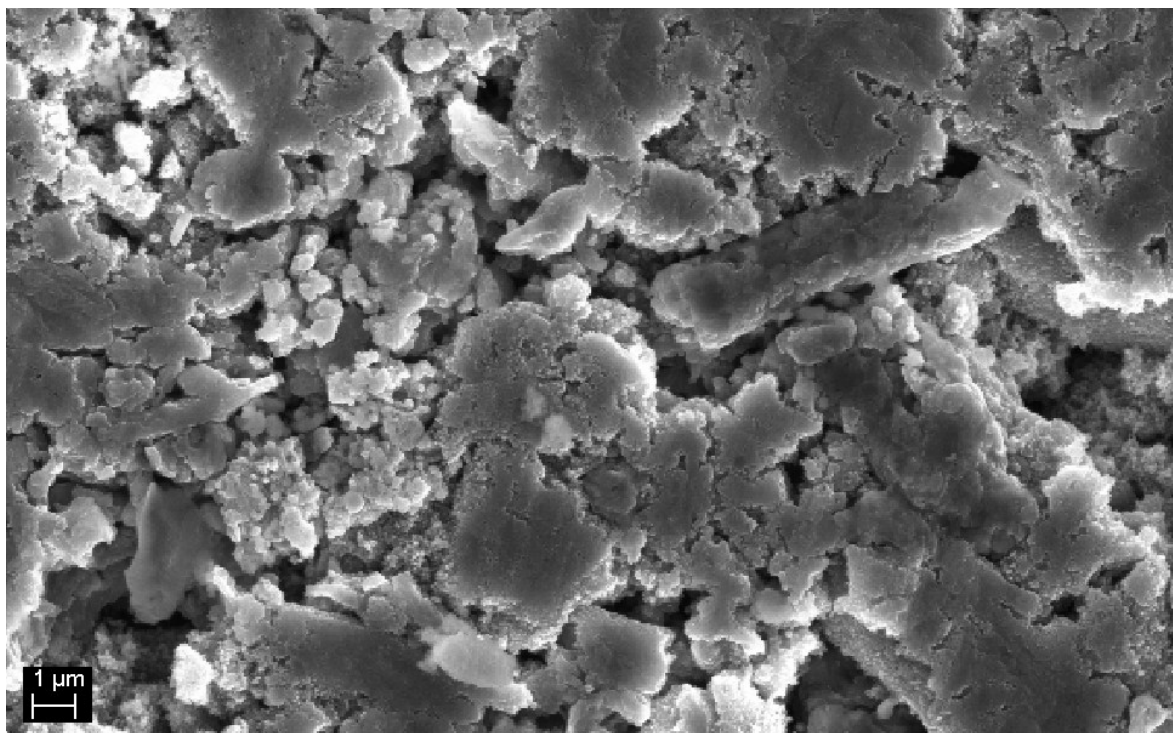

Figure S3: SEM image of sample MgTi15 after cycling in the HPDSC.
